# Supplementary material for: Association of TMEM8B and SPAG8 with Mature Weight in Sheep
Source: PubMed Central journal article supplement (PMC7765121; doi:10.3390/ani10122391), 2020-12-15
Supplement: animals-10-02391-s001.pdf [file animals-10-02391-s001.pdf]

Supplementary Material

## Association of *TMEM8B* and *SPAG8* with mature weight in sheep

Mehmet Ulas Cinar <sup>1,2</sup>, Michelle R. Mousel <sup>3,4</sup>, Maria K. Herndon <sup>1</sup>, J. Bret Taylor <sup>5</sup> and Stephen N. White <sup>1,3,6,\*</sup>

<sup>1</sup> Department of Veterinary Microbiology and Pathology, Washington State University, Pullman, WA 99164, USA; mehmet.cinar@wsu.edu (M.U.C.), mkmeyer@wsu.edu (M.K.H.)

<sup>2</sup> Erciyes University, Faculty of Agriculture, Department of Animal Science, Kayseri 38039, Turkey

<sup>3</sup> Animal Disease Research Unit, Agricultural Research Service, U.S. Department of Agriculture, Pullman, WA 99164, USA; michelle.mousel@usda.gov

<sup>4</sup> School for Global Animal Health, Washington State University, Pullman, WA 99164, USA

<sup>5</sup> Range Sheep Production Efficiency Research Unit, Agricultural Research Service, U.S. Department of Agriculture, Dubois, ID 83423, USA; bret.taylor@usda.gov

<sup>6</sup> Center for Reproductive Biology, Washington State University, Pullman, WA 99164, USA

\* Correspondence: stephen.white@usda.gov

Received: 11 November 2020; Accepted: 13 December 2020; Published: date

**Table S1.** Descriptive statistics for traits measured: abbreviations, number of animals per trait (n), mean, standard error (se), minimum (Min.), and maximum (Max.) values.

| Type of Recording                                 | Trait                                         | Abbreviation                                                | Mean   | SE    | Min   | Max    |
|---------------------------------------------------|-----------------------------------------------|-------------------------------------------------------------|--------|-------|-------|--------|
| Individual                                        | Birth weight (kg)                             | BWT                                                         | 4.88   | 0.75  | 2.67  | 7.75   |
|                                                   | June weight year of birth (kg)                | JWT                                                         | 27.32  | 3.19  | 16.78 | 40.82  |
|                                                   | Adjusted weight to a constant 120 days (kg)   | WT120                                                       | 38.16  | 4.07  | 28.12 | 57.15  |
|                                                   | Weaning weight (kg)                           | WWT                                                         | 37.07  | 4.68  | 29.48 | 68.03  |
|                                                   | August/September weight in the year born (kg) | ASWT                                                        | 42.28  | 4.74  | 29.48 | 68.03  |
|                                                   | Average daily gain (kg)                       | ADG                                                         | 0.27   | 0.03  | 0.19  | 0.43   |
|                                                   | Weight in April/May of 3 years old (kg)       | SPWT3                                                       | 71.22  | 9.02  | 50.80 | 95.25  |
|                                                   | Weight in September of 3 years old (kg)       | FAWT3                                                       | 79.07  | 8.19  | 57.60 | 113.39 |
|                                                   | Weight in April/May of 4 years old (kg)       | SPWT4                                                       | 72.13  | 9.38  | 48.53 | 109.76 |
|                                                   | Weight in September of 4 years old (kg)       | FAWT4                                                       | 82.01  | 8.56  | 53.97 | 114.75 |
|                                                   | Udder score September of 3 years old ewe      | UDDER3                                                      |        |       | Bad   | Good   |
|                                                   | Udder score September of 4 years old ewe      | UDDER4                                                      |        |       | Bad   | Good   |
|                                                   | Subjective milk score 3 years old ewe         | MILK3                                                       |        |       | 0     | 5      |
|                                                   | Subjective milk score 4 years old ewe         | MILK4                                                       |        |       | 0     | 5      |
|                                                   | Lifetime                                      | Total weight of greasy fleece produced in a ewe's life (kg) | LFLWT  | 25.60 | 7.35  | 2.63   |
| Lifetime number of lambs born (count)             |                                               | LLB                                                         | 11.89  | 3.40  | 4.0   | 23.0   |
| Lifetime number of lambs born alive (count)       |                                               | LLBA                                                        | 11.06  | 3.20  | 3.0   | 21.0   |
| Lifetime number of lambs weaned (count)           |                                               | LLW                                                         | 8.93   | 2.63  | 2.0   | 17.0   |
| Total weight of lambs weaned over a lifetime (kg) |                                               | LLWW                                                        | 317.43 | 93.30 | 56.69 | 596.47 |
| Age                                               |                                               | Age                                                         | 6.65   | 1.07  | 5.0   | 9.0    |

**Supplementary Table S2.** Summary of analyzed SNPs and average linkage disequilibrium on OAR2.

| SNP1 ( <i>TMEM8B</i> ) | SNP2 ( <i>SPAG8</i> ) | D'    | r <sup>2</sup> | Distance (bp) |
|------------------------|-----------------------|-------|----------------|---------------|
| OAR2:52409379          | OAR2:52426470         | 0.953 | 0.768          | 17091         |

**Table S3.** *TMEM8B* genotype frequency data in various breeds of sheep from a single location.

| Polymorphism                                          | Genotypes | Breeds  |             |         |         | Overall |
|-------------------------------------------------------|-----------|---------|-------------|---------|---------|---------|
|                                                       |           | Polypay | Rambouillet | Targhee | Suffolk |         |
| <i>TMEM8B</i><br><i>rs426272889</i><br>c.-303-1270C>T | CC        | n       | n           | n       | n       | n       |
|                                                       | CT        | 58      | 92          | 32      | 0       | 182     |
|                                                       | TT        | 80      | 168         | 65      | 0       | 313     |
|                                                       | Total     | 47      | 81          | 57      | 55      | 240     |
|                                                       |           | 185     | 341         | 154     | 55      | 735     |

n: number of individuals. CC: cytosine homozygote; CT: cytosine-thymine heterozygote; TT: thymine homozygote.

**Table S4.** *SPAG8* genotype frequency data in various breeds of sheep from a single location.

| Polymorphism                                     | Genotypes | Breeds  |             |         |         | Overall |
|--------------------------------------------------|-----------|---------|-------------|---------|---------|---------|
|                                                  |           | Polypay | Rambouillet | Targhee | Suffolk |         |
| <i>SPAG8</i><br><i>rs160159557</i> g.52426470G>T | GG        | n       | n           | n       | n       | n       |
|                                                  | GT        | 55      | 92          | 29      | 0       | 176     |
|                                                  | TT        | 61      | 161         | 70      | 0       | 292     |
|                                                  | Total     | 49      | 87          | 69      | 55      | 260     |
|                                                  |           | 165     | 340         | 168     | 55      | 728     |

n: number of individuals. GG: guanine homozygote; GT: guanine-thymine heterozygote; TT: thymine homozygote.

**Supplementary Table S5.** Association of *TMEM8B* *rs426272889* with ewe mature weights showing adjusted means and standard errors in Rambouillet sheep.

| Traits                              | CC (n = 92)               | CT (n = 168)                | TT (n = 81)                 |
|-------------------------------------|---------------------------|-----------------------------|-----------------------------|
| Weight in September at 3 years (kg) | 76.08 ± 0.96 <sup>a</sup> | 78.34 ± 0.80 <sup>a,b</sup> | 80.01 ± 1.01 <sup>b</sup>   |
| Weight in April/May at 4 years (kg) | 68.92 ± 1.06 <sup>a</sup> | 71.68 ± 0.89 <sup>b</sup>   | 71.93 ± 1.12 <sup>a,b</sup> |

Genotype groups with differing letter designations were significantly different ( $p \leq 0.05$ ).

**Supplementary Table S6.** Association of *SPAG8* *rs160159557* (G493C) association with ewe mature weights, showing adjusted means and standard errors in Rambouillet sheep.

| Traits                              | GG (n = 92)               | GT (n = 161)                | TT (n = 87)               |
|-------------------------------------|---------------------------|-----------------------------|---------------------------|
| Weight in September at 3 years (kg) | 76.32 ± 0.95 <sup>a</sup> | 78.28 ± 0.83 <sup>a,b</sup> | 79.97 ± 1.00 <sup>b</sup> |
| Weight in April/May at 4 years (kg) | 69.13 ± 1.07 <sup>a</sup> | 71.86 ± 0.94 <sup>b</sup>   | 72.55 ± 1.14 <sup>b</sup> |

Genotype groups with differing letter designations were significantly different ( $p \leq 0.05$ ).
